# Supplementary material
Source: PubMed Central journal article supplement (PMC307647)
Supplement: pnas_100_26_15794__3.pdf [file pnas_100_26_15794__3.pdf]

DSCR1 - - - - - 100 - - - - - M E E V D L E D L P S A T I A  
Nebula S L P K E G D V D S D T E P E V D A D S F D D L P T S I I V

DSCR1 C H L D P R V F V D G L C R A K F E S L F R T Y D K D I T F 130 140 150  
Nebula T N I H S E V F A N P E L K H A M E E L F R T F S E S A T F

DSCR1 Q Y F K S F K R V R I N F S N P F S A A A D A R L Q L H K T E 160 170 180  
Nebula Q W L R S F R R L R V N Y D N A I A A A N A R I K L H Q Y E

DSCR1 F L G K - E M K L Y F A Q T L H I G S S - H L A P P N P D K 190 200 210  
Nebula F N K K T V I T C Y F A Q P V T P V S N K N L Q P P A P V K

DSCR1 Q F L I S P P A S P P V G W K Q V E D A T P V I N Y D L L Y 220 230 240  
Nebula Q F L I S P P A S P P A G W E P R E E G E P L V N H D L L A

DSCR1 A I S K L G P G E K Y E L H A A T D T T P S V V V H V C E S 250 260 270  
Nebula A L A S L T P G E S H E L H P Q S E D Q P A I I V H T A M L

DSCR1 D Q E K E E E E M E R M R R P K P K I I Q T R R P E Y T P 280 290 300  
Nebula A E T G - - - P G L Q V K A P - - - I V Q T K C P E R A -
