# Supplementary material
Source: PubMed Central journal article supplement (PMC307647)

CS

Antisense

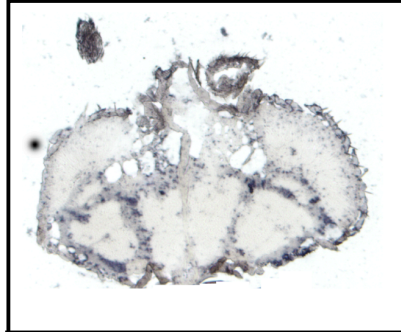

Sense

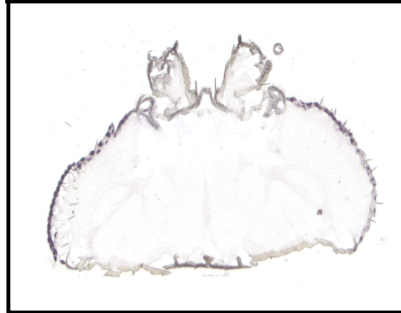

Supplement: pnas_100_26_15794__5.pdf [file pnas_100_26_15794__5.pdf]

**A**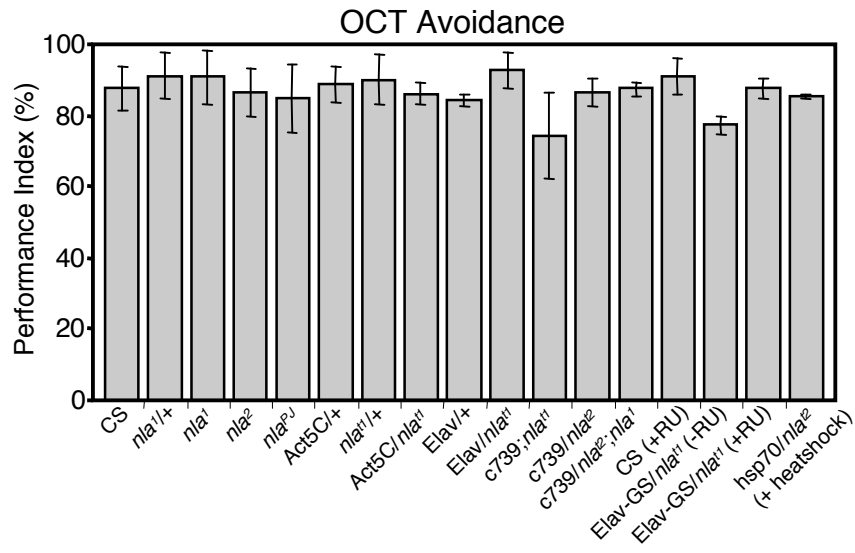**B**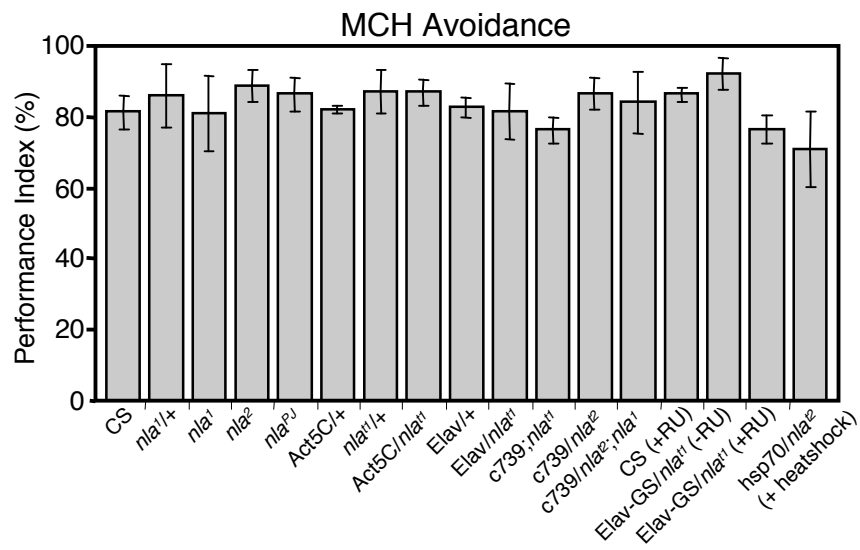**C**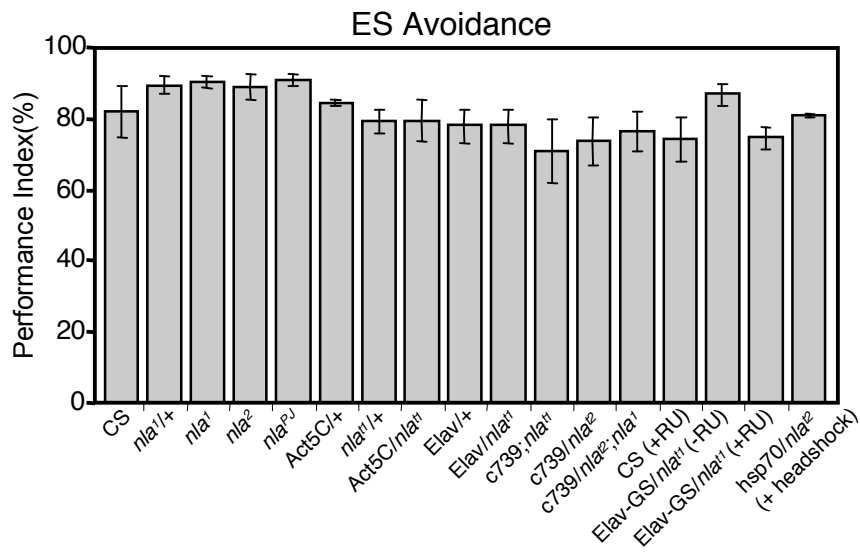

Supplement: pnas_100_26_15794__7.pdf [file pnas_100_26_15794__7.pdf]
